# Supplementary material for: Regulatory T cells in the mouse hypothalamus control immune activation and ameliorate metabolic impairments in high-calorie environments
Source: Springer Nature journal article supplement (doi:10.1038/s41467-025-57918-z), 2025-03-20
Supplement: MOESM1 [file 41467_2025_57918_MOESM1_ESM.pdf]

# **Supplementary Information**

**Contains 10 Supplementary Figures**

**and**

**3 Supplementary Tables.**

**Regulatory T-cells in the murine hypothalamus control immune activation and  
improve metabolic impairments upon high-calorie environments**

## **Authors**

Maike Becker<sup>1,2</sup>, Stefanie Kälin<sup>3,2</sup>, Anne H. Neubig<sup>1,2</sup>, Michael Lauber<sup>1,2</sup>, Daria Opaleva<sup>1,2</sup>, Hannah Hipp<sup>1,2</sup>, Victoria K. Salb<sup>1,2</sup>, Verena B. Ott<sup>3,2</sup>, Beata Legutko<sup>3</sup>, Roland E. Kälin<sup>4,5</sup>, Markus Hippich<sup>6,2</sup>, Martin G. Scherm<sup>1,2</sup>, Lucas F. R. Nascimento<sup>1,2</sup>, Isabelle Serr<sup>1,2</sup>, Fabian Hosp<sup>7</sup>, Alexei Nikolaev<sup>8</sup>, Alma Mohebiany<sup>8</sup>, Martin Krueger<sup>9</sup>, Bianca Flachmeyer<sup>9</sup>, Michael Pfaffl<sup>10</sup>, Bettina Haase<sup>11</sup>, Chun-Xia Yi<sup>12</sup>, Sarah Dietzen<sup>13</sup>, Tobias Bopp<sup>13</sup>, Stephen C. Woods<sup>14</sup>, Ari Waisman<sup>8</sup>, Benno Weigmann<sup>15</sup>, Matthias Mann<sup>7</sup>, Matthias H. Tschöp<sup>2,3,\*</sup> and Carolin Daniel<sup>1,2,16,\*</sup>

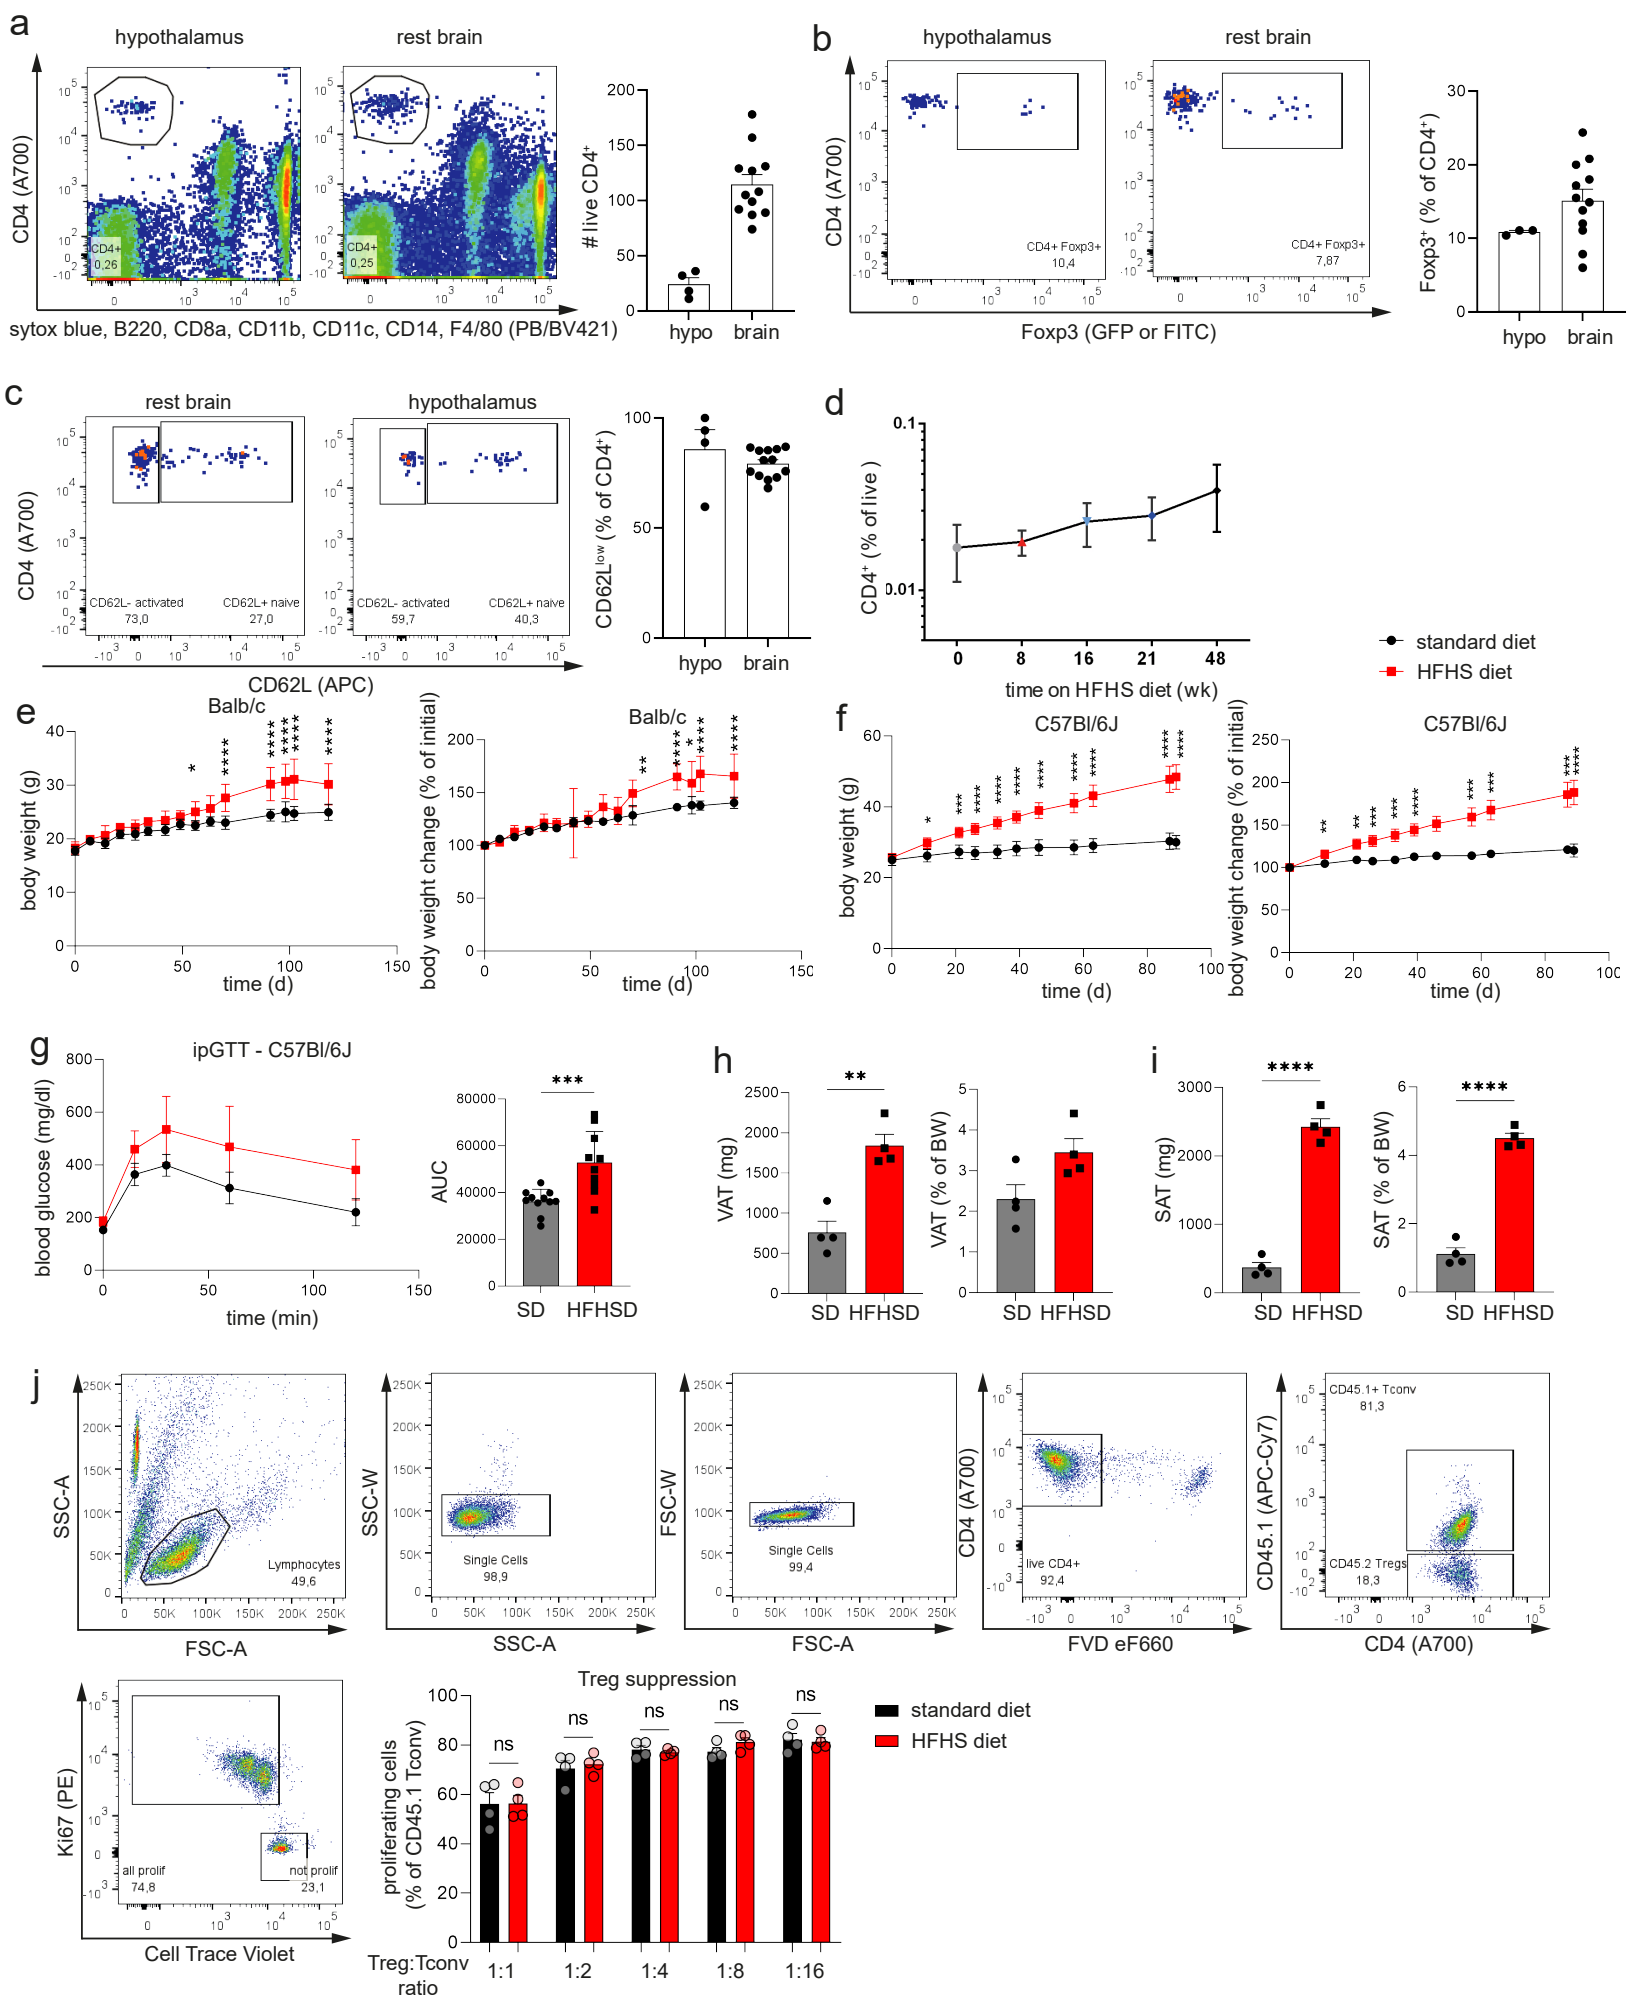

**Supplementary Figure 1: Identification of CD4<sup>+</sup>T cells in brains of healthy mice.  
Related to Figures 1 and 2:**

**(a-c)** Representative FACS plots and the corresponding quantification of (a) CD4<sup>+</sup>T cells, (b) Foxp3GFP<sup>+</sup>Tregs and (c) CD4<sup>+</sup>CD62L<sup>low</sup>T cells in murine hypothalamus vs. rest brain after transcardial perfusion using 10 U/ml heparin in 0.9% NaCl. N=3-14 biological replicates. Mean±SEM. Two-tailed student's unpaired *t*-test.  $P(a)=0.0001$ ;  $p(b)=0.2050$ ;  $p(c)=0.2706$ .

**(d)** Frequencies of CD4<sup>+</sup>T cells isolated from murine hypothalamus after exposure of 8-48 weeks to a HFHS diet. Mean±SD.

**(e-f)** Body weight curves of mice fed the standard diet vs. HFHS diet. Mean±SD. Two-way ANOVA with Šidák post-hoc test. Exact *p*-values and N numbers are provided in the Source Data file.

**(g)** ipGTT and the area under the curve (AUC) of C57Bl/6J mice fed the standard diet vs. HFHS diet for 16 weeks. Mean±SD and n=10-11 biological replicates per group. Two-tailed student's unpaired *t*-test,  $p=0.0010$ .

**(h-i)** Visceral adipose tissue (VAT, h) and subcutaneous adipose tissue (SAT, i) mass at the end of the study (of g). Mean±SEM and n=4 biological replicates. Two-tailed student's unpaired *t*-test,  $p(VAT, mg)=0.0014$ ;  $p(VAT, \%)=0.0561$ ;  $p(SAT, mg)<0.0001$ ;  $p(SAT, \%)<0.0001$ .

**(j)** Representative FACS plots and the corresponding quantification of an *in vitro* Treg suppression assay using naïve CD45.1 Tconv cells that were suppressed by Tregs from mice that were fed with the standard diet or the HFHS diet as in (a). Treg:Tconv ratio was titrated from 1:1 to 1:16. n=4 biological replicates per group. Two-tailed student's unpaired *t*-test per condition with  $p(1:1)=0.9895$ ;  $p(1:2)=0.6641$ ;  $p(1:4)=0.5605$ ;  $p(1:8)=0.1410$ ;  $p(1:16)=0.7955$ .

Source data are provided as a Source Data file. \*= $p<0.05$ ; \*\*= $p<0.01$ , \*\*\*= $p<0.001$ , \*\*\*\*= $p<0.0001$ .

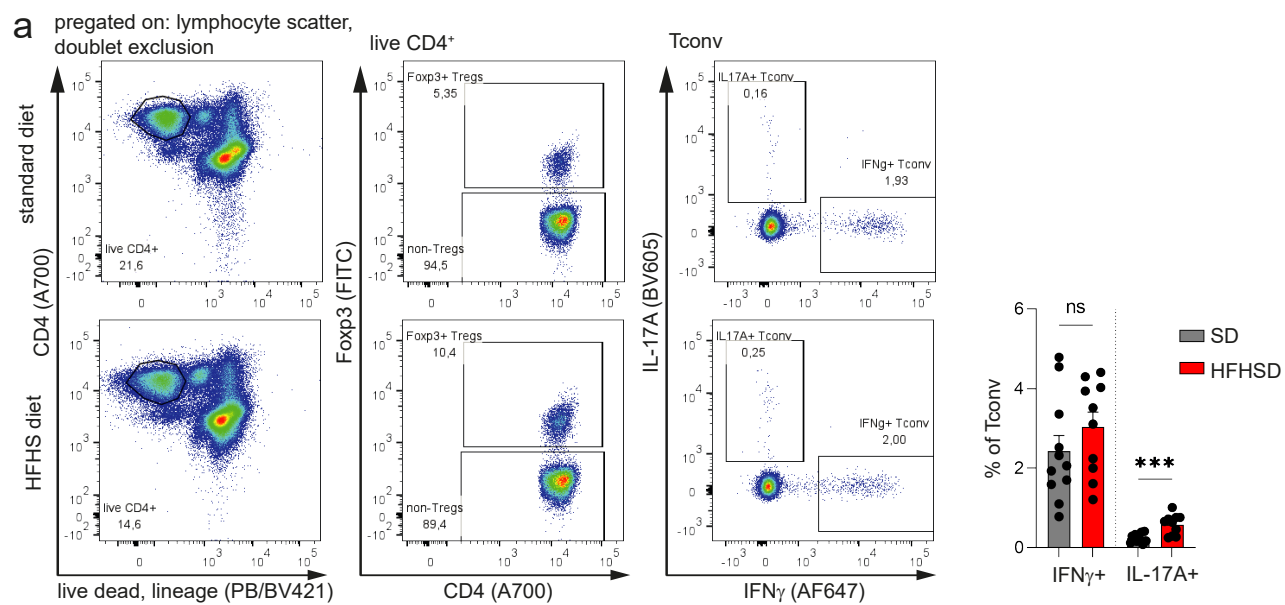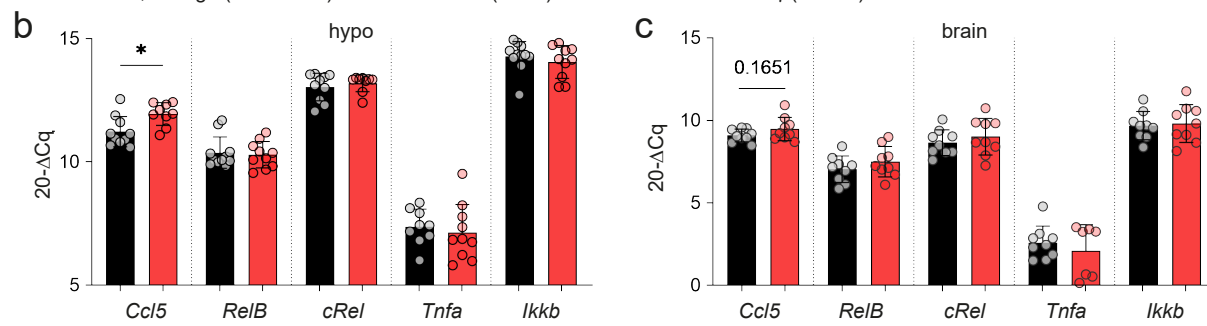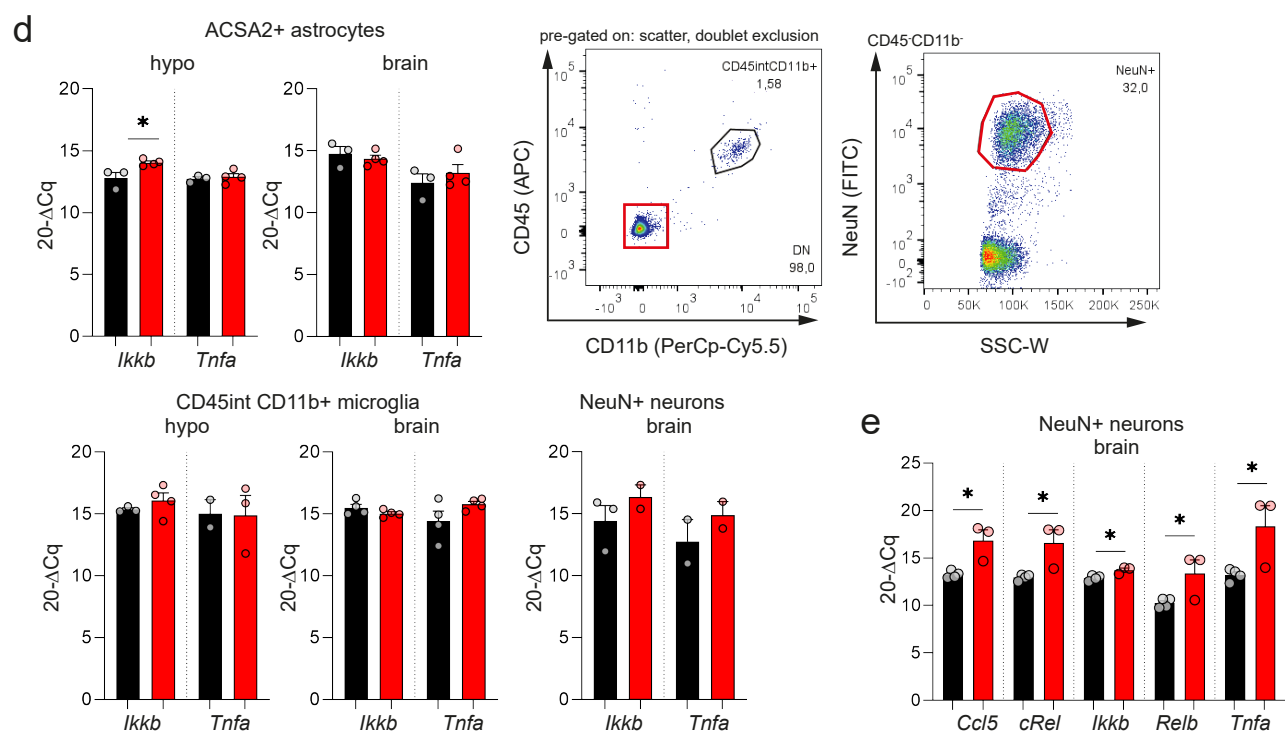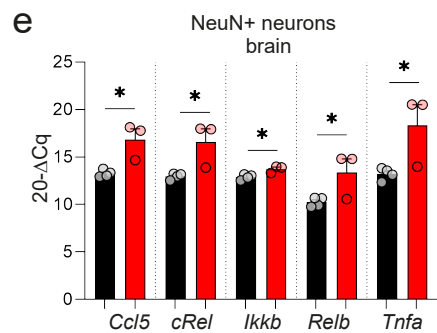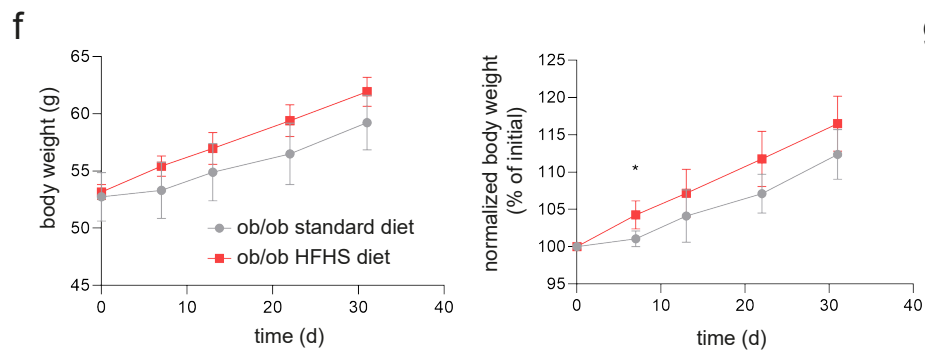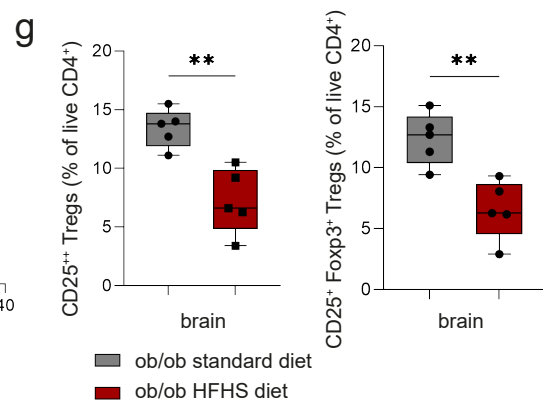

**Supplementary Figure 2: Cytokine profiles of T cells and suppressive capacity of Tregs isolated from mice fed a HFHS diet. Related to Figure 2.**

(a) Representative FACS plots and the corresponding quantification of cytokine expression in CD4<sup>+</sup>T cells isolated from lymph nodes of wildtype C57Bl/6J mice fed a standard diet vs HFHS diet. n=10-11 biological replicates per group. Two-tailed Student's unpaired *t*-test with  $p(\text{IFN}\gamma)=0.2780$ ;  $p(\text{IL17A})=0.0006$ .

(b-c) Gene expression analyses of (b) hypothalamic and (c) rest brains of standard diet vs HFHS diet-fed wildtype C57Bl/6J mice. Gene expression was normalized to *Histone*. Mean $\pm$ SEM. N=9-11 biological replicates per group. Two-tailed Student's unpaired *t*-test. Hypothalamus:  $p(\text{Ccl5})=0.0115$ ;  $p(\text{Relb})=0.7463$ ;  $p(\text{cRel})=0.4826$ ;  $p(\text{Tnfa})=0.6135$ ;  $p(\text{Ikkb})=0.403$ . Brain:  $p(\text{Ccl5})=0.1651$ ;  $p(\text{Relb})=0.2800$ ;  $p(\text{cRel})=0.4284$ ;  $p(\text{Tnfa})=0.9020$ ;  $p(\text{Ikkb})=0.7943$ .

(d) Gene expression analyses of sorted cell populations. ACSA2<sup>+</sup> astrocytes were MACS-sorted. For sorting plots for microglia (CD45<sup>int</sup>CD11b<sup>+</sup>) and Neurons (CD45<sup>-</sup>CD11b<sup>-</sup>NeuN<sup>+</sup>) see representative FACS plots. Sorted cell populations were from either standard diet- or 16 wk HFHS diet fed wildtype C57Bl/6J mice. Gene expression was normalized to *Histone H3* and plotted as 20-Delta Cq. N=3-4 biological replicates per group. Mean $\pm$ SEM. Two-tailed Student's unpaired *t*-test. Hypothalamus:  $p(\text{Ikkb})=0.0278$ ;  $p(\text{Tnfa})=0.6712$ ; Brain:  $p(\text{Ikkb})=0.5421$ ;  $p(\text{Ikkb})=0.4495$ .

(e) FACS-sorted NeuN<sup>+</sup> neurons from rest brains of Balb/c mice fed a standard diet vs. a HFHS diet for 16 wk. Gene expression was normalized to *Histone H3* and plotted as 20-Delta Cq. N=3-4 biological replicates per group. Mean $\pm$ SEM. Two-tailed Student's unpaired *t*-test with  $p(\text{Ccl5})=0.0124$ ;  $p(\text{cRel})=0.0252$ ;  $p(\text{Ikkb})=0.0178$ ;  $p(\text{Relb})=0.0488$ ;  $p(\text{Tnfa})=0.0403$ .

(f) Body weight curves of ob/ob mice fed a standard diet or HFHS diet. n=5 biological replicates per group. Mean $\pm$ SD.

(g) Treg frequencies in brains of ob/ob mice of (E). n=5 biological replicates per group. Depicted are box-and-whisker plots (min to max with all data points). Two-tailed Student's unpaired *t*-test.  $p(\text{CD25}^{+++})=0.0025$ ;  $p(\text{Foxp3}^{+})=0.0037$ .

Source data are provided as a Source Data file. \*= $p<0.05$ ; \*\*= $p<0.01$ .

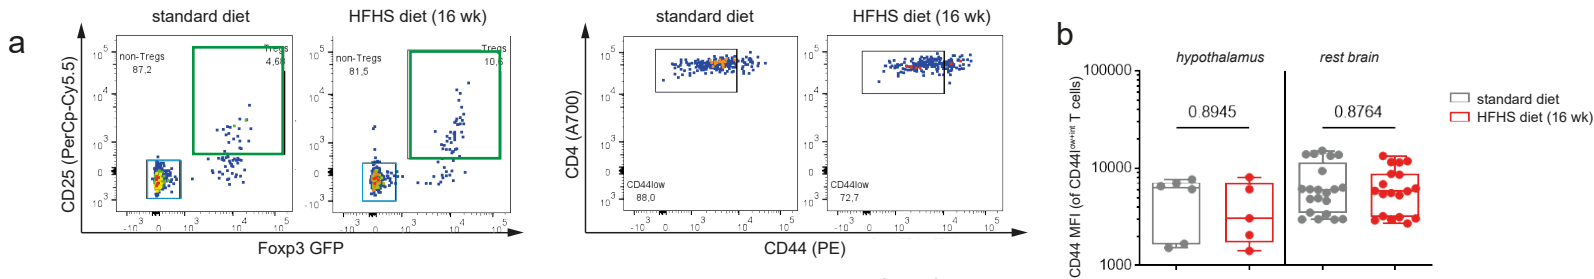

**c** regulated genes:  
hypothalamus-residing CD4<sup>+</sup> T cells  
from *ob/ob* mice

GO:0044267 ~ cellular protein metabolic process  
GO:0010468 ~ regulation of gene expression  
GO:0031326 ~ regulation of cellular biosynthetic process  
GO:0019219 ~ regulation of nucleobase, nucleoside, nucleotide and nucleic acid metabolic process  
GO:0010556 ~ regulation of macromolecule biosynthetic process  
GO:0045449 ~ regulation of transcription  
GO:0006464 ~ protein modification process  
GO:0007242 ~ intracellular signaling cascade  
GO:0016070 ~ RNA metabolic process  
GO:0016310 ~ phosphorylation  
GO:0015031 ~ protein transport

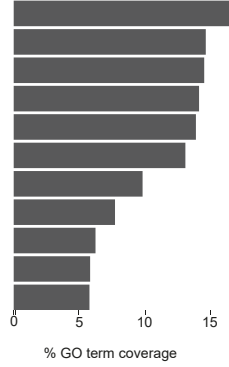

**d** regulated genes:  
hypothalamus-residing CD4<sup>+</sup>CD25<sup>high</sup> T cells  
from *ob/ob* mice

GO:0044267 ~ cellular protein metabolic process  
GO:0010468 ~ regulation of gene expression  
GO:0031326 ~ regulation of cellular biosynthetic process  
GO:0010556 ~ regulation of macromolecule biosynthetic process  
GO:0019219 ~ regulation of nucleobase, nucleoside, nucleotide and nucleic acid metabolic process  
GO:0045449 ~ regulation of transcription  
GO:0006464 ~ protein modification process  
GO:0006508 ~ proteolysis  
GO:0016070 ~ RNA metabolic process  
GO:0007242 ~ intracellular signaling cascade  
GO:0016310 ~ phosphorylation  
GO:0030163 ~ protein catabolic process  
GO:0015031 ~ protein transport  
GO:0009966 ~ regulation of signal transduction  
GO:0044257 ~ cellular protein catabolic process  
GO:0006396 ~ RNA processing

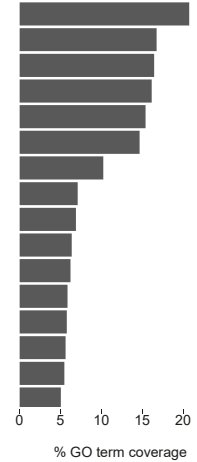

**e** overlap in regulated genes in  
hypothalamus-residing CD4<sup>+</sup> T cells

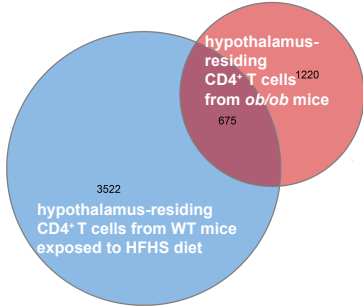

**f** overlap in regulated genes in  
hypothalamus-residing CD4<sup>+</sup>CD25<sup>high</sup> T cells

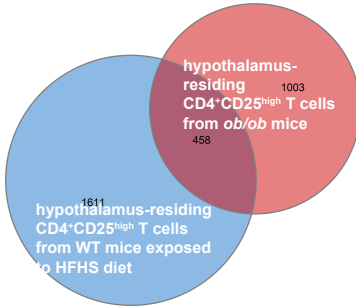

RNA-Seq data of hypothalamus-residing CD4<sup>+</sup> T cell populations

**g** CD4<sup>+</sup> T cells  
Top 25 fold-changes

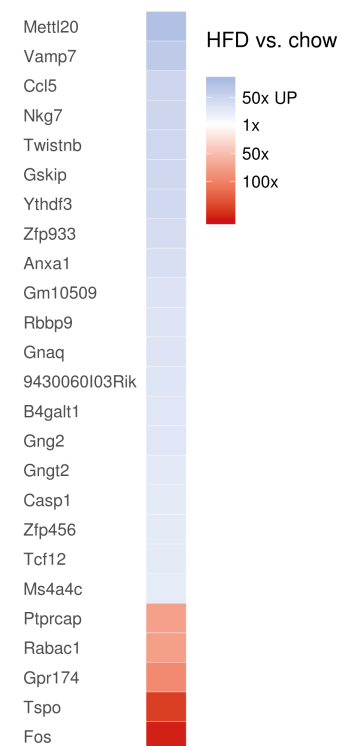

**h** CD25<sup>+</sup>Foxp3<sup>+</sup> T cells  
Top 50 fold-changes

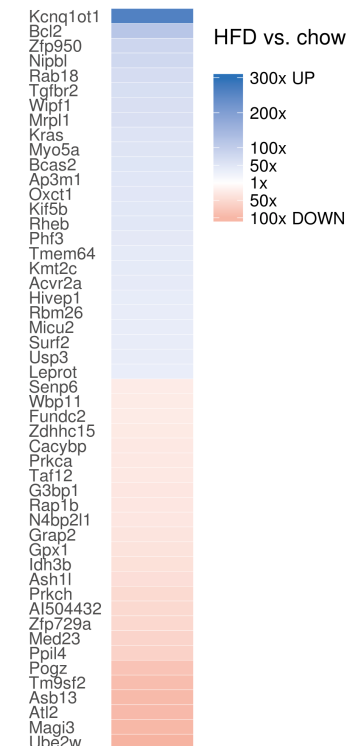

**i** CD4<sup>+</sup> T cells  
Top 50 fold-changes

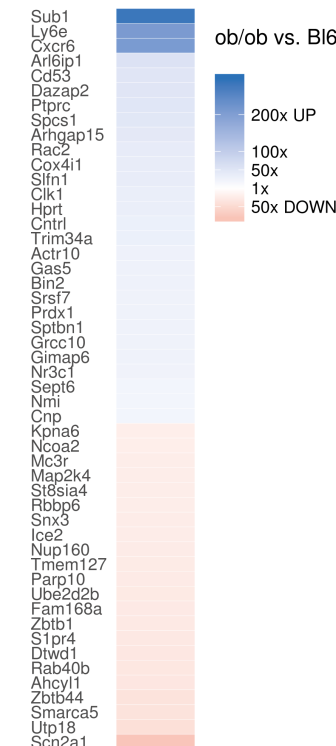

**j** CD25<sup>high</sup> T cells  
Top 50 fold-changes

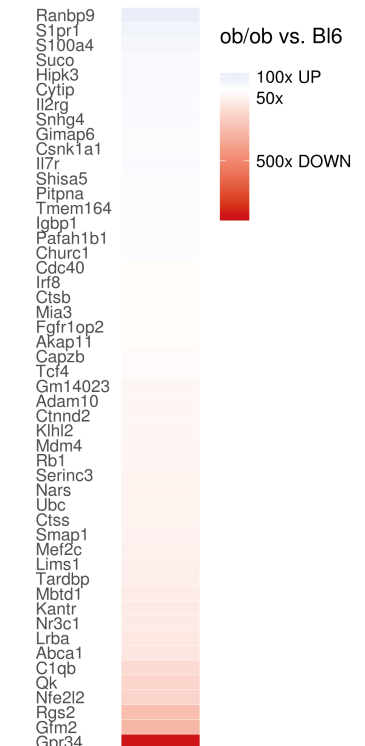

**Supplementary Figure 3: Transcriptome analyses of hypothalamic CD4<sup>+</sup>T cells.  
Related to Figure 3:**

(a) Representative sorting scheme for T cells used for RNA-Seq showing CD4<sup>+</sup>CD25<sup>-</sup>Foxp3 GFP<sup>-</sup>CD44<sup>low+int</sup> and CD4<sup>+</sup>CD25<sup>hi</sup>Foxp3 GFP<sup>+</sup> cells. Cells were pre-gated based on lymphocyte scatter, doublet exclusion, and live CD4<sup>+</sup> T cells.

(b) analyses of the mean fluorescence intensity (MFI) of CD44 abundance on CD4<sup>+</sup>CD25<sup>-</sup>Foxp3 GFP<sup>-</sup>CD44<sup>low+int</sup> T cells as in (a) to demonstrate the absence of a difference in maturational status of sorted input cell populations used for sequencing experiments. N=5-21 biological replicates. Two-tailed Student's unpaired *t*-test with  $p(Hypo)=0.5888$ ;  $p(brain)=0.6646$ .

(c-d) DESeq2 normalized read counts regulated more than 2.5-fold (*ob/ob* vs. C57Bl/6J) were functionally annotated to Gene Ontology Biological Processes (GOBP) level 5 using DAVID Bioinformatics Resources 6.7. Terms are depicted as percentage GO term gene coverage for (c) hypothalamic CD4<sup>+</sup>T cells and (d) hypothalamic CD4<sup>+</sup>CD25<sup>high</sup>Foxp3<sup>+</sup>T cells.

(e-f) Venn-diagram of regulated genes of (e) hypothalamic CD4<sup>+</sup>T cells and (f) CD4<sup>+</sup>CD25<sup>high</sup>Foxp3<sup>+</sup>T cells from *ob/ob* mice and C57Bl/6J mice fed HFHS diet.

(g-j) Top fold-changes of DESeq2 normalized read counts of (g) CD4<sup>+</sup> and (h) CD4<sup>+</sup>CD25<sup>+</sup>Foxp3GFP<sup>+</sup> T cell populations from HFHS diet- vs. SD-fed Foxp3GFP reporter mice, as well as of (i) CD4<sup>+</sup> T cells and (j) CD4<sup>+</sup>CD25<sup>hi</sup> T cells from *ob/ob* vs. C57Bl/6J mice. A cutoff of 30 reads was applied.



**Supplementary Figure 4: Transcriptome analysis of hypothalamic CD4<sup>+</sup>T cells.  
Related to Figure 3:**

**(a)** Representative FACS plot for activated T cells (non-Tregs) used for RNA-Seq (revision). Cells were pre-gated based on lymphocyte scatter, doublet exclusion. Activated T cells (non-Tregs) were gated as live CD4<sup>+</sup>CD25<sup>-</sup>Foxp3GFP<sup>-</sup>CD44<sup>high</sup>CD62L<sup>low</sup> and Tregs were gated as live CD4<sup>+</sup>CD25<sup>+</sup>Foxp3GFP<sup>+</sup>. The final Treg gate is shown in green, the final activated T cell gate shown in blue. Depicted is a representative plot for cells isolated from perfused brains of Foxp3<sup>GFP</sup> reporter mice on 16-18 wks of a HFHSD, n=5 mice were pooled for each sequencing sample.

**(b-e)** Volcano plot of differentially expressed genes in FACS-sorted activated T cells (as shown in a), comparing T cells from (b, d) hypothalami and (c, e) brains of Foxp3<sup>GFP</sup> reporter mice that were on a HFHSD vs SD.

**(f-g)** Volcano plot of differentially expressed genes comparing Tregs vs activated T cells isolated from brains of mice on a HFHSD.

**(h)** Gene set enrichment analysis of activated T cells from hypothalami on mice on a HFHSD vs SD. A positive normalized enrichment score (NES) refers to gene sets upregulated in response to hypercaloric feeding.

**(i)** Volcano plot for activated T cells isolated from hypothalami of HFHS diet vs. SD mice in which genes of the leading edge (of h) on cell cycle terms are highlighted in red.

a regulated genes:  
hypothalamus-residing CD4<sup>+</sup> T cells  
from mice exposed to HFHS diet:  
terms related to metabolism

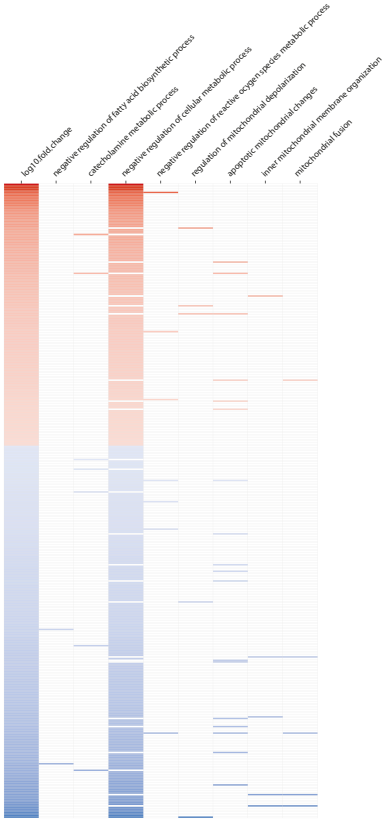

b regulated genes:  
hypothalamus-residing CD4<sup>+</sup>CD25<sup>high</sup>Foxp3<sup>+</sup> T cells  
from mice exposed to HFHS diet:  
terms related to metabolism

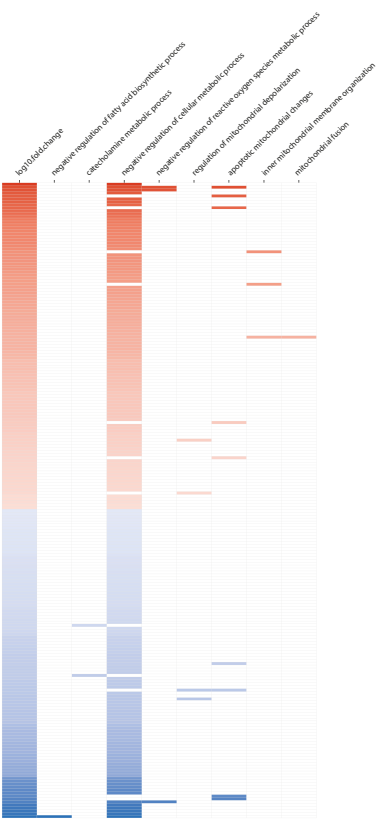

c Regulated genes in hypothalamic  
CD4<sup>+</sup> T cells from *ob/ob* mice:  
terms related to metabolism

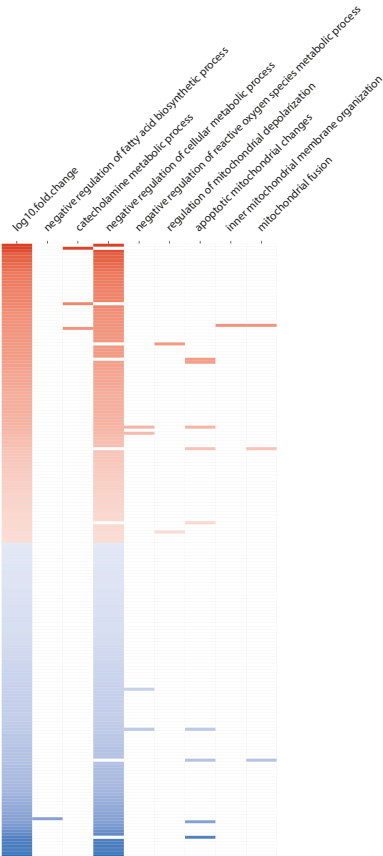

d Regulated genes in hypothalamic  
CD4<sup>+</sup>CD25<sup>high</sup> T cells from *ob/ob* mice:  
terms related to metabolism

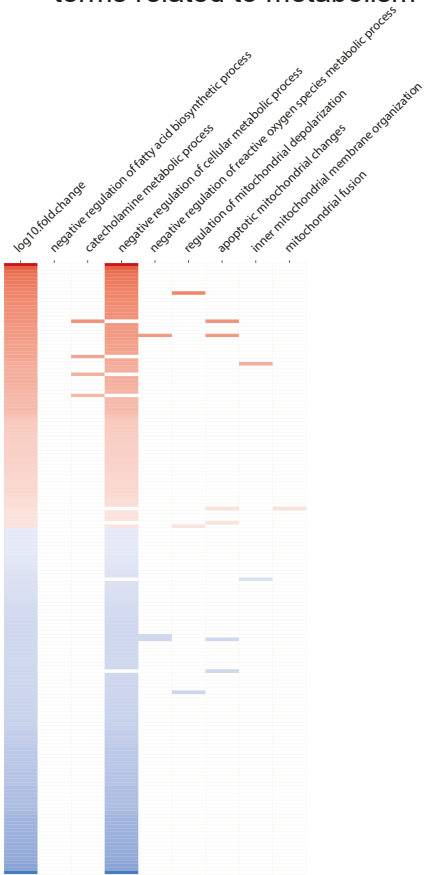

**Supplementary Figure 5: Transcriptome analysis of hypothalamic CD4<sup>+</sup>T cells.  
Related to Figure 3:**

(a-b) Regulated genes (HFHS vs. standard diet) were annotated to selected metabolism-associated GOBP terms and color-coded by log<sub>10</sub>-fold-change; (a) hypothalamic CD4<sup>+</sup> T cells and (b) hypothalamic CD4<sup>+</sup>CD25<sup>high</sup>Foxp3<sup>+</sup> T cells from mice exposed to the HFHS diet.

(c-d) Regulated genes (*ob/ob* vs. HFHS diet-fed C57Bl/6J mice) were annotated to selected metabolism-associated GOBP terms and color-coded by log<sub>10</sub>-fold-change; (c) hypothalamic CD4<sup>+</sup> T cells and (d) hypothalamic CD4<sup>+</sup>CD25<sup>high</sup> T cells.

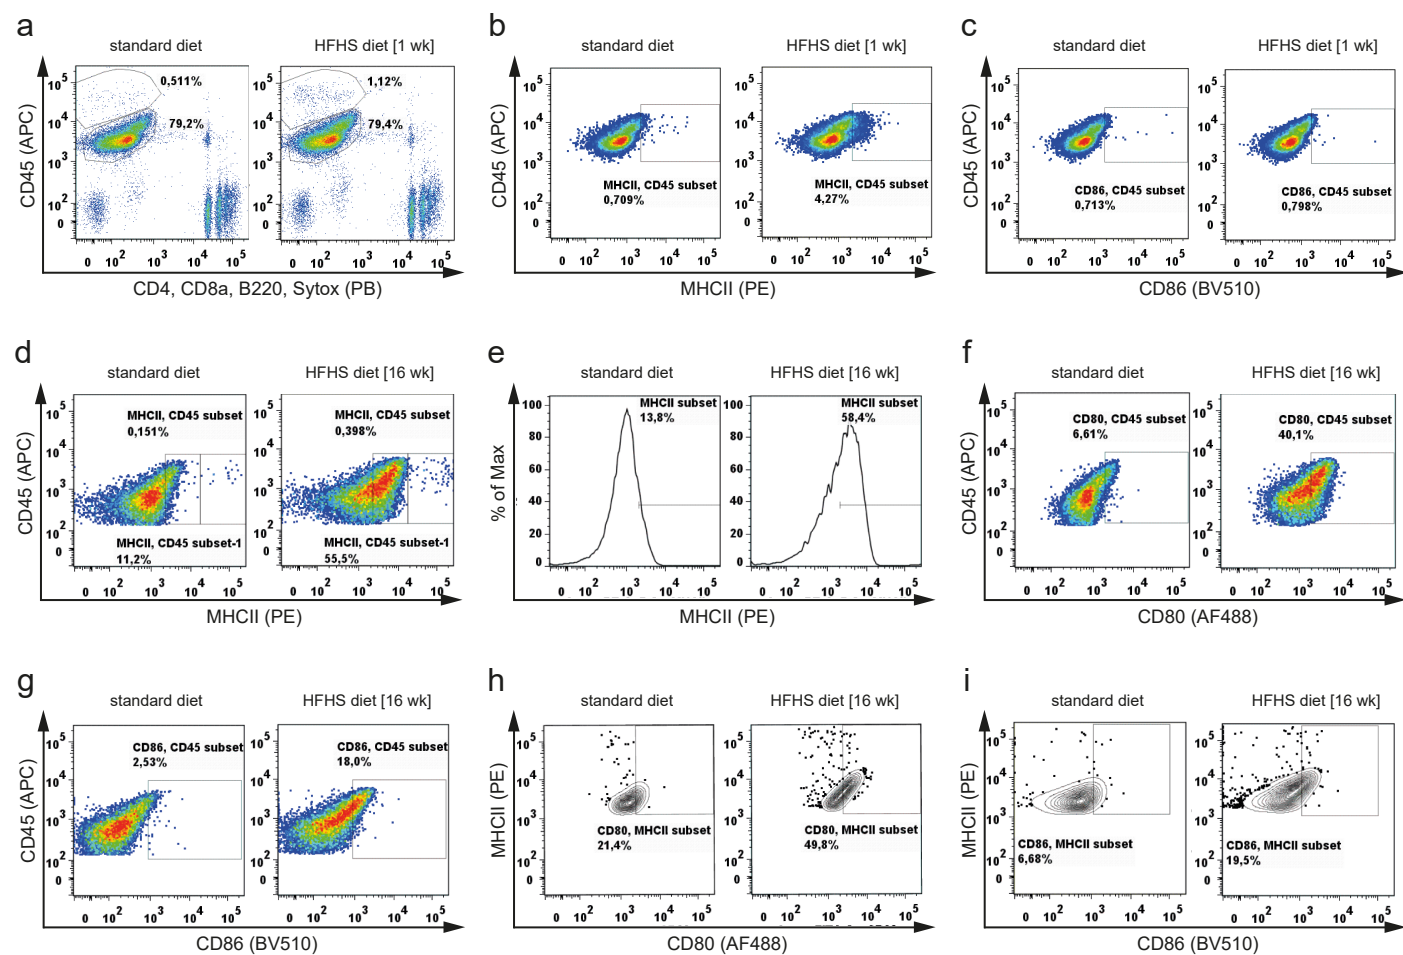

**j** FACS sort-purity for CD45<sup>int</sup>CD11b<sup>+</sup> microglia for proteomic analyses

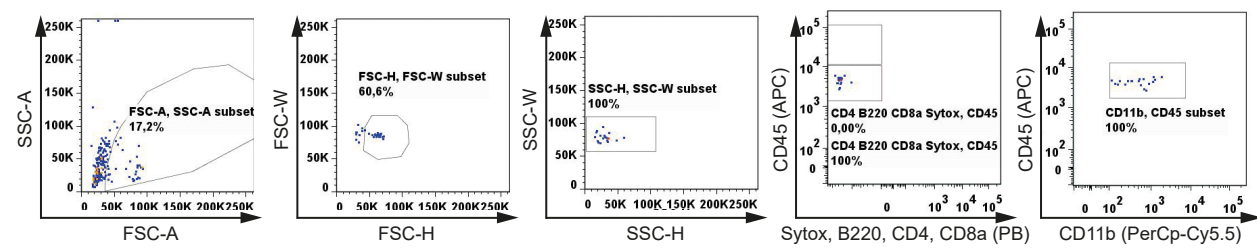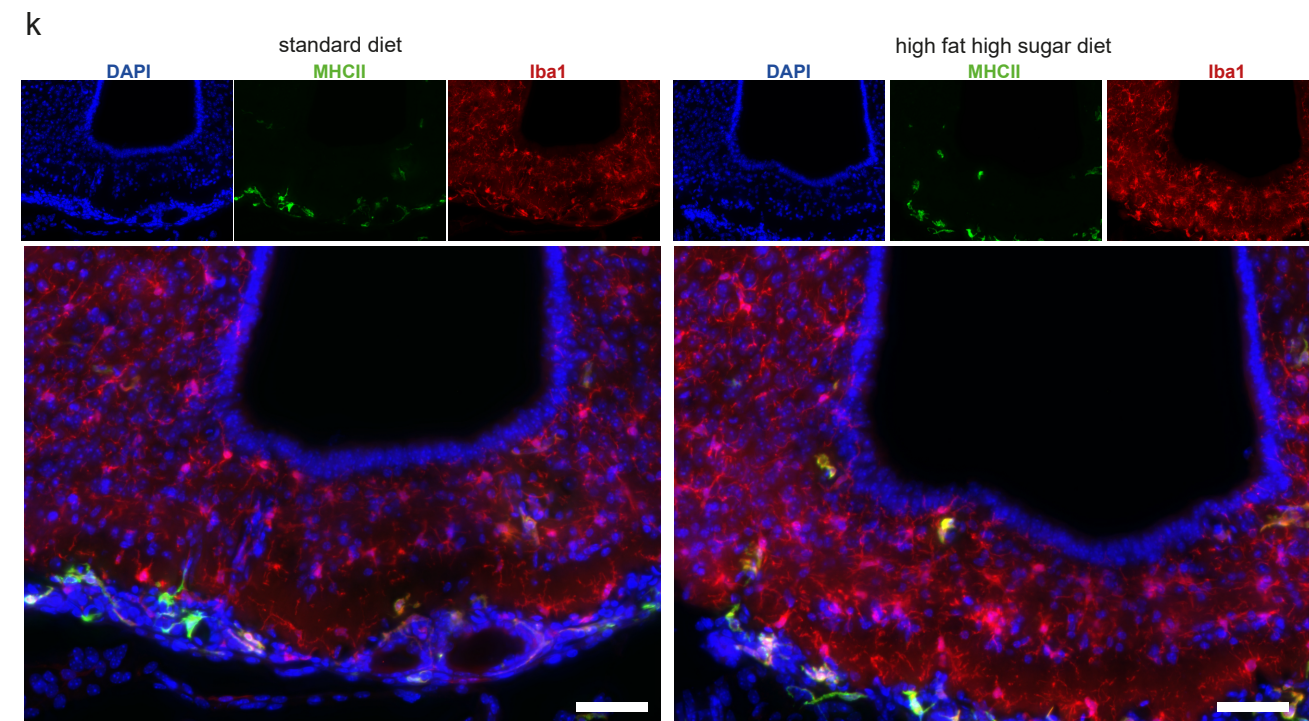

**Supplementary Figure 6: Immune activation of microglia upon hyper-caloric challenge. Related to Figure 4:**

**(a-i)** Antigen-presenting functions of **(a)** CD45<sup>int</sup>CD11b<sup>+</sup> microglia upon exposure to HFHS diet **(a-c)** for 1 wk or **(d-i)** 16 wk as assessed by co-stainings of CD80, CD86 and MHCII.

**(j)** Representative FACS plot for sort-purity of CD45<sup>int</sup>CD11b<sup>+</sup> microglia used for proteomic analyses.

**(k)** Immunofluorescence of nuclei (DAPI, blue), microglia (Iba1, red), MHCII (green) and the merged image of mice exposed to standard diet or one year of HFHS diet. The scale bar is 50  $\mu$ m.

a

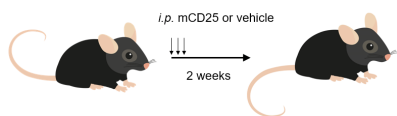

b

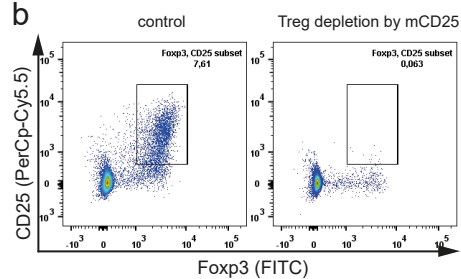

c

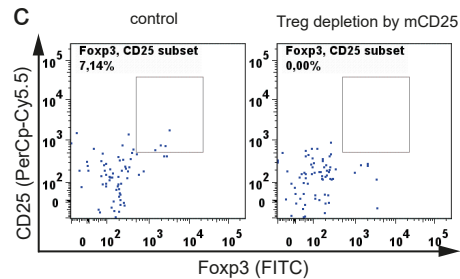

d

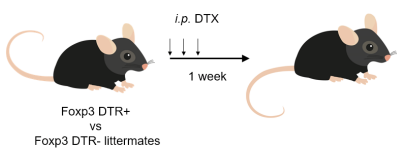

e

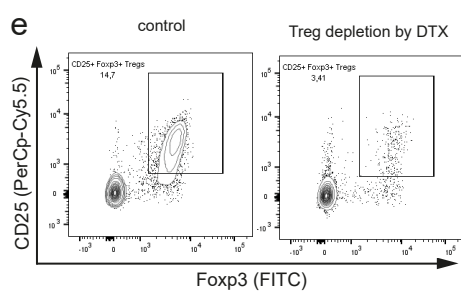

f

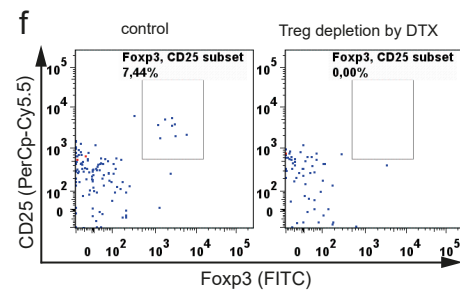

g

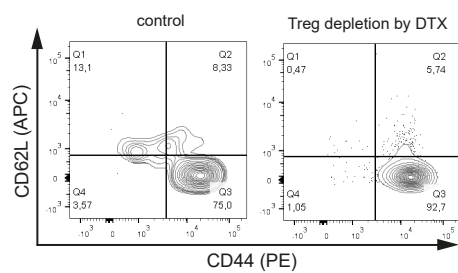

h

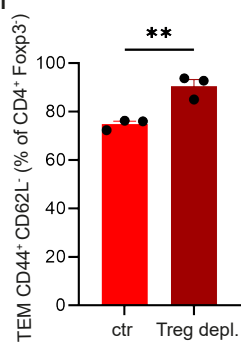

i

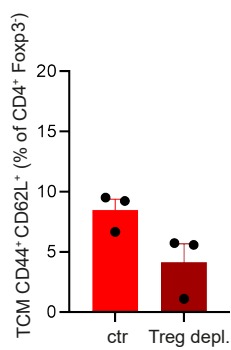

**Supplementary Figure 7: Two loss-of-function models of *in vivo* Treg depletion. Related to Figure 5 and 6:**

**(a)** Scheme of the *in vivo* Treg depletion using *i.p.* administration of mCD25 antibodies.

**(b-c)** Representative FACS plots showing the efficacy of the Treg depletion by *i.p.* mCD25 administration in (b) inguinal LNs and (c) hypothalamus after 1 wk HFHS diet as determined by intracellular staining for Foxp3.

**(d)** Scheme of the *in vivo* Treg depletion using *i.p.* diphtheria toxin (DTX) administration in Foxp3 DTR mice.

**(e-f)** Representative FACS plots showing the efficacy of Treg depletion by *i.p.* diphtheria toxin (DTX) administration in Foxp3 DTR mice. Shown are the effects on the CD4<sup>+</sup>T cell population in (e) inguinal LNs and the (f) hypothalamus after 2 wk of HFHS diet as determined by intracellular staining for Foxp3.

**(g-i)** Representative FACS plots and quantification of (h) CD4<sup>+</sup>Foxp3<sup>-</sup>CD44<sup>hi</sup>CD62L<sup>low</sup> effector memory T cells (TEM) and (i) CD4<sup>+</sup>Foxp3<sup>-</sup>CD44<sup>hi</sup>CD62L<sup>+</sup> central memory T cells (TCM) in rest brains of Foxp3 DTR mice with or without Treg depletion by *i.p.* DTX administration. N=3 biological replicates per group. Mean±SEM. Two-tailed student's unpaired *t*-test,  $p(\text{TEM})=0.2592$ ;  $p(\text{TCM})=0.0706$ .

Source data are provided as a Source Data file. \*= $p<0.05$ ; \*\*= $p<0.01$ .

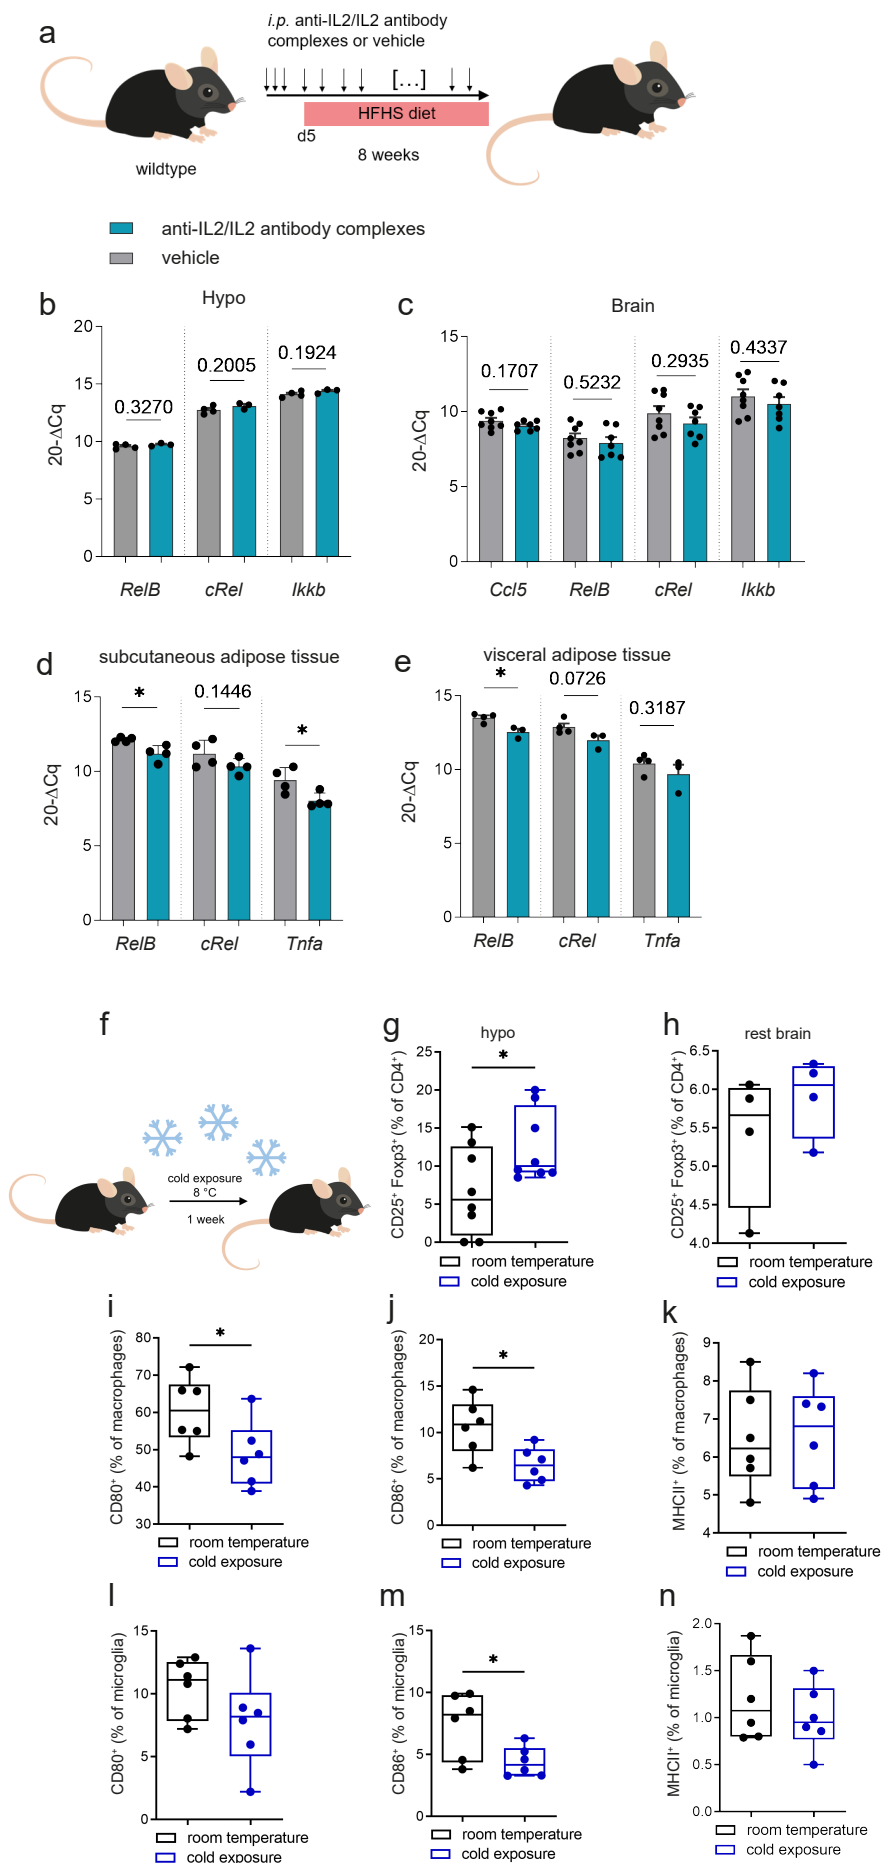

**Supplementary Figure 8: Treg modulation by anti-IL2/IL2 antibody complexes or cold exposure. Related to Figure 7:**

(a) Scheme of the *in vivo* Treg expansion experiment using anti-IL2/IL2 antibody complexes.

(b-e) Gene expression analyses of (b) hypothalami, (c) brains, (d) subcutaneous adipose tissue and (e) visceral adipose tissue of the mice from (a). Gene expression was normalized to *Histone H3*. N=3 biological replicates per group. Mean±SEM. Two-tailed student's unpaired *t*-test. Hypo:  $p(RelB)=0.3270$ ;  $p(cRel)=0.2005$ ;  $p(Ikbb)=0.1924$ . Brain:  $p(Ccl5)=0.1707$ ;  $p(Relb)=0.5232$ ;  $p(cRel)=0.2935$ ;  $p(Ikbb)=0.4337$ . Subcutaneous adipose tissue:  $p(Relb)=0.1446$ ;  $p(cRel)=0.0155$ ;  $p(Tnfa)=0.0309$ . visceral adipose tissue:  $p(Relb)=0.0726$ ;  $p(cRel)=0.0129$ ;  $p(Tnfa)=0.3187$ .

(f) Scheme of the *in vivo* cold exposure experiments. Mice were subjected to 8°C ambient temperature for one week.

(g-h) CD25<sup>hi</sup> Foxp3<sup>+</sup> Treg frequencies in (g) hypothalamus ( $p=0.0435$ ) and (h) rest brain ( $p=0.3400$ ) after *in vivo* cold exposure. Two-tailed student's unpaired *t*-test. N=8 or 4 biological replicates. Depicted are box-and-whisker plots (min to max with all data points).

(i-k) Flow cytometric analysis of the expression of co-stimulatory molecules (i: CD80, j: CD86) or MHCII (k) on CD45<sup>hi</sup>CD11b<sup>+</sup> macrophages after *in vivo* cold exposure. N=6 biological replicates. Depicted are box-and-whisker plots (min to max with all data points).  $p(CD80)=0.0460$ ,  $p(CD86)=0.0168$ ,  $p(MHCII)=0.9319$ .

(l-n) Flow cytometric analysis of the expression of co-stimulatory molecules (l: CD80, m: CD86) or MHCII (n) on CD45<sup>int</sup>CD11b<sup>+</sup> microglia after *in vivo* cold exposure. N=6 biological replicates. Depicted are box-and-whisker plots (min to max with all data points).  $p(CD80)=0.1775$ ,  $p(CD86)=0.0292$ ,  $p(MHCII)=0.4065$ .

Source data are provided as a Source Data file.  $\ast=p<0.05$ .

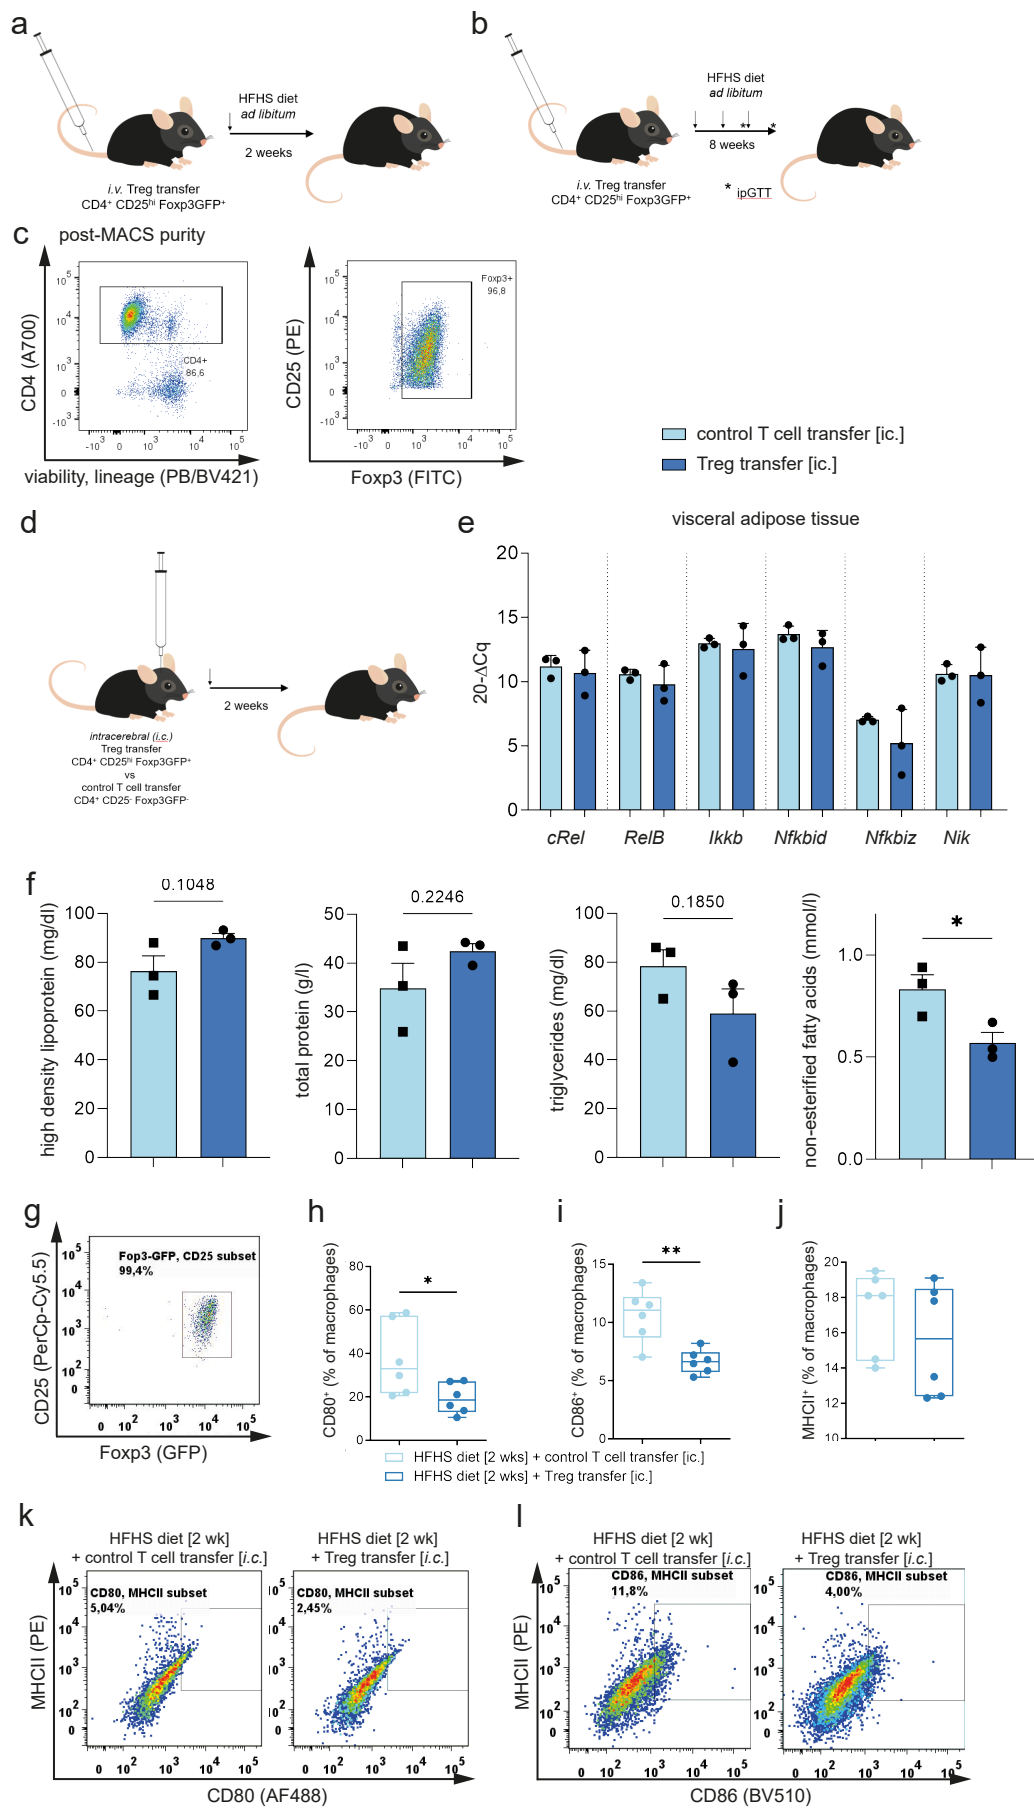

**Supplementary Figure 9: Treg transfer models as a gain-of-function model to improve metabolic health. Related to Figure 8 and Figure 9**

(a-b) Scheme of *i.v.* Treg transfer experiments.

(c) Post-MACS sort purity for the enrichment of CD4<sup>+</sup>CD25<sup>hi</sup> Tregs analyzed by intracellular Foxp3 staining post-transfer of the *i.v.* Treg transfer cohort.

(d) Scheme of *i.c.* Treg vs control T cell transfer experiments.

(e) Gene expression analyses of visceral adipose tissue of the mice from (d). Gene expression was normalized to *Histone H3*. Mean±SEM. N=3 biological replicates per group. Two-tailed student's unpaired *t*-test.  $P(cRel)=0.6686$ ;  $p(Relb)=0.4268$ ;  $p(Ikbb)=0.7329$ ;  $p(Nfkbid)=0.2890$ ;  $p(Nfkbiz)=0.2971$ ;  $p(Nik)=0.9315$ .

(f) Plasma analyses of (d). Mean±SEM. N=3 biological replicates per group. Two-tailed student's unpaired *t*-test.  $P(HDL)=0.1048$ ;  $p(\text{total protein})=0.2246$ ;  $p(\text{triglycerides})=0.1850$ ;  $p(NEFAs)=0.0392$ .

(g) Representative plot of the FACS post sort-purity of dump-CD4<sup>+</sup>CD25<sup>hi</sup>Foxp3GFP<sup>+</sup> Tregs used for *i.c.* transfer experiments.

(h-j) Flow cytometric analysis of (h) CD80, (i) CD86 and (j) MHCII expression on CD45<sup>high</sup>CD11b<sup>+</sup> macrophages after *i.c.* Treg or control T cell transfer and exposure to 2 wk HFHS diet. N=6 biological replicates. Depicted are box-and-whisker plots (min to max with all data points). Two-tailed student's unpaired *t*-test with  $p(CD80)=0.0363$ ;  $p(CD86)=0.0027$ ;  $p(MHCII)=0.3338$ .

(k-l) Analysis of costimulatory molecule co-expression on hypothalamic CD45<sup>int</sup>CD11b<sup>+</sup> microglia after *i.c.* Treg or control T cell transfer and exposure to 2 wk HFHS diet.

Source data are provided as a Source Data file.  $\ast=p<0.05$ .

### standard diet

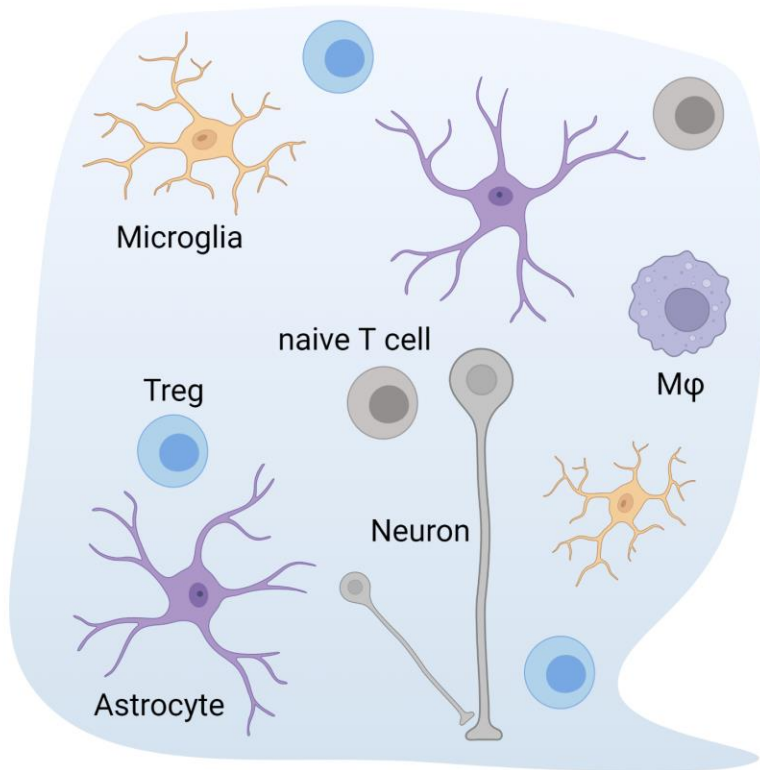

### hypothalamic homeostasis

steady-state microglia and Mφ

balance between hypothalamic Tregs and activated hypothalamic CD4<sup>+</sup> T cells

### high-fat high-sugar diet (HFHS)

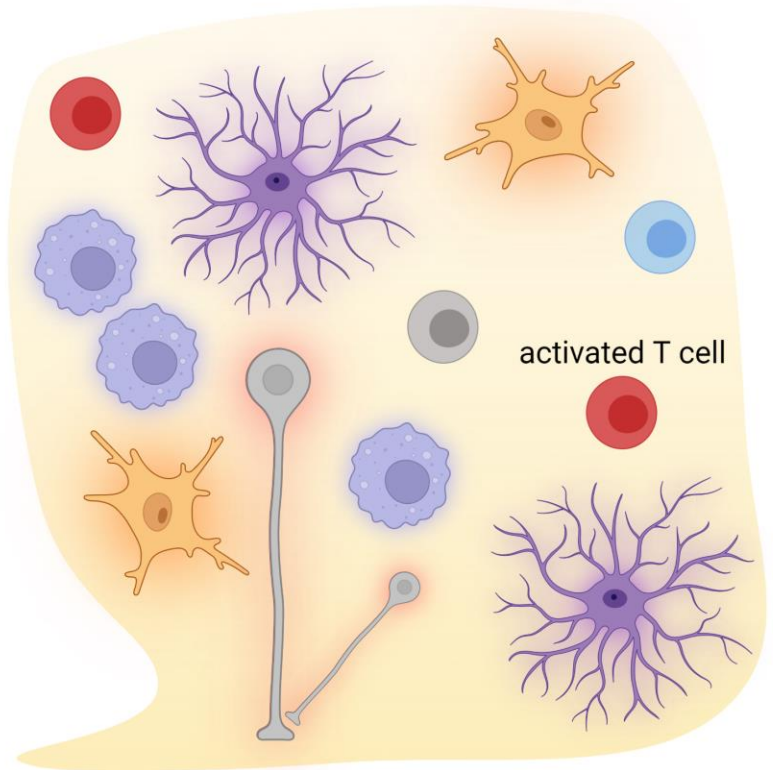

### hypothalamic inflammation

activation of microglia and Mφ  
reactivity: CD80 ↑, CD86 ↑, MHCII ↑

decrease in hypothalamic Tregs

Th1-like activation of hypothalamic CD4<sup>+</sup> T cells

gain-of-function: Treg transfer (iv/ic)

HFHS

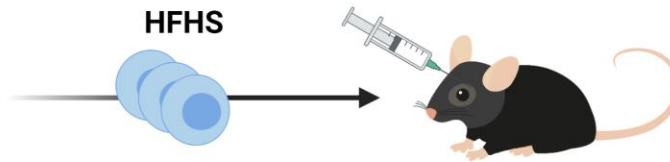

hypothalamic homeostasis

loss-of-function: Treg depletion

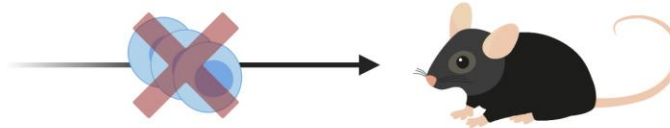

hypothalamic inflammation

**Supplementary Figure 10: Regulatory T-cells in the hypothalamus control immune activation and improve metabolic impairments upon high-calorie environments.**

A visual summary of the key findings from this study, highlighting that a hypercaloric challenge leads to microglia and macrophage reactivity, a significant reduction in hypothalamic Tregs, and a Th1-like activation of conventional CD4<sup>+</sup> T cells in the hypothalamus. Gain-of-function experiments, including i.v. and i.c. Treg transfers, can restore hypothalamic immune activation following exposure to an HFHS diet, while loss-of-function experiments involving Treg depletion exacerbate hypothalamic inflammation. Created in BioRender. Scherm, M. (2025) <https://BioRender.com/y95o387>.

**Supplementary Table 1**

| <b>antibody</b>            | <b>manufacturer</b> | <b>clone, cat#, RRID</b>                           |
|----------------------------|---------------------|----------------------------------------------------|
| CD4 Biotin                 | BioLegend           | Clone: GK1.5; Cat# 553728;<br>RRID:AB_395012       |
| CD8a Pacific Blue          | BioLegend           | Clone: 53-6.7; Cat# 100725;<br>RRID:AB_493425      |
| CD11b Pacific Blue         | BioLegend           | Clone: M1/70; Cat# 101224;<br>RRID:AB_755986       |
| CD11c Brilliant Violet 421 | BioLegend           | Clone: N418; Cat# 117330;<br>RRID:AB_11219593      |
| B220 Pacific Blue          | BioLegend           | Clone: RA3-6B2; Cat# 103227;<br>RRID:AB_492876     |
| F4/80 Pacific Blue         | BioLegend           | Clone: BM8; Cat# 123124;<br>RRID:AB_893475         |
| CD25 PerCP-Cy5.5           | BioLegend           | Clone: PC61; Cat# 102030;<br>RRID:AB_893288        |
| CD44 PE                    | BioLegend           | Clone: IM7; Cat# 103008;<br>RRID:AB_312959         |
| Ki67 APC                   | BioLegend           | Clone: 16A8; Cat# 652406;<br>RRID:AB_2561930       |
| Ki67 Brilliant Violet 605  | BioLegend           | Clone: 16A8; Cat# 652413;<br>RRID:AB_2562664       |
| CD4 Alexa Fluor 700        | eBioscience         | Clone: RM4-5; Cat# 56-0042-82;<br>RRID:AB_494000   |
| CD62L APC                  | eBioscience         | Clone: MEL-14; Cat# 17-0621-82;<br>RRID:AB_469410  |
| Foxp3 FITC                 | eBioscience         | Clone: FJK-16s; Cat# 11-5773-82;<br>RRID:AB_465243 |
| CD14 V450                  | BD Biosciences      | Clone: rmC5-3; Cat# 560639;<br>RRID:AB_1727429     |
| CD4 Pacific Blue           | BioLegend           | Clone: GK1.5; Cat# 100428<br>RRID:AB_493647        |
| CD11b PerCp-Cy5.5          | BioLegend           | Clone: M1/70; Cat# 101228<br>RRID:AB_893232        |
| CD45 APC                   | BioLegend           | Clone: 30-F11; Cat# 103112<br>RRID:AB_312977       |
| CD45 Alex Fluor 700        | BioLegend           | Clone: 30-F11; Cat# 103128<br>RRID:AB_493715       |
| CD45 PE-Cy7                | BioLegend           | Clone: 30-F11; Cat# 103113<br>RRID:AB_312978       |

|                                    |                             |                                                   |
|------------------------------------|-----------------------------|---------------------------------------------------|
| CD45.1 APC-Cy7                     | BioLegend                   | Clone: A20; Cat# 110716; RRID: AB_313505          |
| CD86 Brilliant Violet 510          | BioLegend                   | Clone: GL-1; Cat# 105039<br>RRID:AB_2562370       |
| CD86 APC-Cy7                       | BioLegend                   | Clone: GL-1; Cat# 105029<br>RRID:AB_2074993       |
| CD80 Alexa Fluor 488               | BioLegend                   | Clone: 16-10A1; Cat# 104715<br>RRID:AB_492823     |
| MHCII I-A PE                       | eBioscience                 | Clone: NIMR-4; Cat# 12-5322-81<br>RRID:AB_465930  |
| NeuN-                              | Sigma Aldrich               | Clone: A60; Cat# MAB377X;<br>RRID:AB_2149209      |
| Goat anti-GFP                      | Acris antibodies            | Polyclonal; Cat# R1091P<br>RRID:AB_1002036        |
| Rabbit anti-GFAP                   | Dako                        | Cat# Z0334; RRID:AB_10013382                      |
| Rabbit anti-Iba1                   | Synaptic Systems            | Polyclonal; Cat# 234 003<br>RRID:AB_10641962      |
| Armenian hamster anti-CD3          | BioLegend                   | Clone: 145-2C11; Cat# 100301<br>RRID:AB_312666    |
| Rat anti-Foxp3                     | eBioscience                 | Clone: FJK-16s; Cat# 14-5773-82<br>RRID:AB_467576 |
| Rat anti-CD4                       | BD                          | Clone: GK1.5; Cat# 553727<br>RRID:AB_395011       |
| Rabbit anti-Collagen IV            | Millipore                   | Clone: AB756P; Cat# AB756P<br>RRID:AB_2276457     |
| Anti-mouse CD25 (mCD25)            | BioXCell                    | Clone: PC-61.5.3; Cat# BE0012;<br>RRID:AB_1107619 |
| CellTrace Violet                   | Invitrogen                  | Cat#C34557                                        |
| Fc-Block                           | BD Pharmingen               | Clone: 2.4G2; Cat# 553142;<br>RRID:AB_394657      |
| Donkey anti-goat Alexa Fluor 488   | Life Technologies           | Cat# A11055; RRID:AB_2534102                      |
| Donkey anti-rabbit Alexa Fluor 568 | Life Technologies           | Cat# A10042; RRID:AB_2534017                      |
| Goat anti-hamster Alexa Fluor 488  | Jackson ImmunoResearch Labs | Cat# 127-545-160;<br>RRID:AB_2338997              |
| Biotinylated rabbit anti-goat      | Vector                      | Cat# BA-5000; RRID:AB_2336126                     |
| Biotinylated goat anti-rat         | Jackson ImmunoResearch Labs | Cat# 112-065-175;<br>RRID:AB_2338180              |
| Goat anti-rabbit Alexa Fluor 488   | Jackson ImmunoResearch Labs | Cat# 111-545-144;<br>RRID:AB_2338052              |

**Supplementary Table 2**

| Mouse line                                                         | Source                                                    | RRID                  |
|--------------------------------------------------------------------|-----------------------------------------------------------|-----------------------|
| CD90.1 Balb/c; genotype: CBy.PL(B6)- <i>Thy1<sup>a</sup></i> /ScrJ | Jackson Laboratory                                        | RRID:IMSR_JAX:005443  |
| CD90.2 Balb/c; genotype: Balb/cByJ                                 | Jackson Laboratory                                        | RRID:IMSR_JAX:001026  |
| Foxp3 GFP Balbc; genotype: C.Cg-Foxp3 <sup>tm2Tch</sup> /J         | Jackson Laboratory                                        | RRID:IMSR_JAX:006769  |
| Foxp3 GFP Bl6; genotype: B6.Cg-Foxp3 <sup>tm2Tch</sup> /J          | Jackson Laboratory                                        | RRID:IMSR_JAX:006772  |
| CD45.1 Bl6 “wt”; genotype: B6.SJL- <i>PtprcaPepcb</i> /BoyJ        | Jackson Laboratory                                        | RRID:IMSR_JAX:002014  |
| <i>ob/ob</i> mice; genotype: B6.Cg- <i>Lep<sup>ob</sup></i> /J     | Jackson Laboratory                                        | RRID:IMSR_JAX:000632  |
| Foxp3-DTR; genotype: C57BL/6-Tg(Foxp3-DTR/EGFP)23.2Spar/Mmjax      | Tobias Bopp, Johannes Gutenberg University Mainz, Germany | RRID:MMRRC_032050-JAX |
| Wildtype C57Bl/6J                                                  | Jackson Laboratory                                        | RRID:IMSR_JAX:000664  |
| Wildtype Balb/cByJ                                                 | Jackson Laboratory                                        | RRID:IMSR_JAX:001026  |

**Supplementary Table 3**

| <b>gene</b>   | <b>forward primer</b>          | <b>reverse primer</b>            | <b>source</b>                  |
|---------------|--------------------------------|----------------------------------|--------------------------------|
| <i>Relb</i>   | gcc ttg ggt tcc agt gac        | tgt att cgt cga tga ttt<br>cca a | Vigo Heissmeyer;<br>LMU Munich |
| <i>cRel</i>   | TTTCCTTCCTGATGAACATGG          | CACGGCAGATCCTTAATTCT             | Vigo Heissmeyer;<br>LMU Munich |
| <i>Ikkb</i>   | ccg gaa agt gtc agc tgt<br>atc | cct cag ctg gaa gaa gga<br>ga    | Vigo Heissmeyer;<br>LMU Munich |
| <i>Nik</i>    | tcc aca gaa tga agg aca<br>agc | tac ccg aaa cac ctc gag<br>tc    | Vigo Heissmeyer;<br>LMU Munich |
| <i>Nfkbid</i> | ttt cta ccc tcc gtc aga<br>cc  | tac agc cgg gta tcc aga<br>ga    | Vigo Heissmeyer;<br>LMU Munich |
| <i>Nfkbiz</i> | gag tcc cgt ccc aga ggt        | ttc acg cga aca cct tga          | Vigo Heissmeyer;<br>LMU Munich |
| <i>Ccl5</i>   | TGCAGTCGTGTTTGTCCTC            | ATGCCCATTTTCCCAGGACC             | Self-designed                  |
| <i>Tnfa</i>   | ATGAGAAGTTCCCAAATGGC           | CTCCACTTGGTGGTTTGCTA             | Self-designed                  |
